# Supplementary material
Source: PubMed Central journal article supplement (PMC7999957)
Supplement: pnas.2021758118.sapp.pdf [file pnas.2021758118.sapp.pdf]

1

2

3

4

5

6

## Supplementary Information

## 7 Supplementary Materials and Methods

### 8 **Study design**

9 The objective of this study was to determine the neural circuits involved in kidney protection induced by VNS.  
10 First, we performed optogenetic VNS in *Chat-ChR2*, *Vglut2-ChR2* and control mice before kidney IRI surgery,  
11 and we found that efferent fiber stimulation or sensory afferent fiber stimulation both confer kidney protection.  
12 Then we performed splenectomy and adoptive transfer experiments in *Chat-ChR2*, *Vglut2-ChR2* and control  
13 mice to show that splenocytes play a critical role. We further performed a series of experiments in *Vglut2-*  
14 *ChR2* and control mice to identify the downstream pathway of afferent fiber stimulation. Then we hypothesized  
15 that C1 neurons in the medulla oblongata mediate the protective effect of vagus afferent fiber stimulation  
16 against kidney IRI based on our previous work (1). To test this hypothesis, we bilaterally microinjected AAV2-  
17 DIO-taCasp3-TEVp into the RVLM of *Dbh-Cre* mice to selectively ablate C1 neurons without affecting other  
18 types of neurons and performed electrical (distal or central) VNS in these mice. We also used Sprague-Dawley  
19 rats to demonstrate that vagal afferent stimulation activates the sympathetic nervous system (splenic, renal and  
20 lumbar) because of the difficulty to record from these nerves (especially splenic nerve) in mice. Sample size  
21 was determined based on previous pilot and published experiments (1, 2). No data were excluded from the  
22 analysis. Experiments were performed using littermates, which facilitates appropriate randomization. Within  
23 the littermate groups, animals were selected for IRI or sham surgeries at random. IRI surgeries were performed  
24 by an operator blinded to experimental setting including genotype. Plasma creatinine measurements and  
25 histological analysis were performed by investigators blinded to experimental setting. Plasma corticosterone  
26 and tissue norepinephrine levels were measured by an independent core facility in a blinded fashion.

27

### 28 **Plasma creatinine/cytokine measurement, renal histology, and real-time PCR**

29 Plasma was prepared by centrifuging heparinized blood at 7,000 g for 5 min. Plasma creatinine was determined  
30 by using an enzymatic method as per the manufacturer's protocol (Diazyme Laboratories) that we have  
31 validated using LC-MS (2). Plasma cytokine levels (TNF $\alpha$  and IL-6) were determined by ELISA as per the

32 manufacturer's protocol (Thermo Fisher Scientific). Plasma measurements were performed by investigators  
33 blinded to experimental setting. The extent of kidney injury was assessed using H&E-stained kidney sections  
34 (5  $\mu$ m) as previously described (2). The sections were viewed by light microscopy (Zeiss AxioImager Z1  
35 microscope, Carl Zeiss Microscopy). Photographs were taken with an AxioCam MRc camera (Zeiss), and  
36 brightness/contrast and white balance adjustments were made using StereoInvestigator software (Version 11;  
37 MBF Bioscience). The extent of kidney injury was assessed in an unbiased, systematic manner using design-  
38 based stereology to achieve statistically accurate random sampling of kidney sections, yielding the percentage  
39 of total area of the section occupied by injured tubules. The investigator was blinded to the experimental  
40 identity of the sections. Sections were imaged by using a Zeiss Axio Imager Z1 Microscope fitted with  
41 motorized focus drives and motorized XYZ microscope stage and integrated to a work station running  
42 StereoInvestigator software (MBF Bioscience). The area fraction fractionator probe was used for stereological  
43 analysis of the fractional area of the section occupied by tubular damage. The following parameters were  
44 defined: counting frame, 400 x 400  $\mu$ m; sample grid, 800 x 800  $\mu$ m; grid spacing, 85  $\mu$ m. These values were  
45 determined empirically such that adequate numbers of sample sites were visited and adequate numbers of  
46 markers (indicating injured tubules) were acquired, in keeping with accepted counting rules for stereology.  
47 Injured tubules were identified based on the presence of cast formation, tubule dilation, and/or tubular  
48 epithelial denucleation. A total of  $275 \pm 7.3$  (mean  $\pm$  s.e.m.) grid sites was evaluated per section. For  
49 immunofluorescent labeling of kidney and spleen sections, samples were prepared and analyzed as previously  
50 described (3). Periodate-lysine-paraformaldehyde-fixed frozen sections were stained with an anti-Ly6G  
51 antibody (rat monoclonal, 1:2,500, MAB1037, R&D Systems) and anti-TH antibody (sheep polyclonal,  
52 1:1,000; Millipore #AB1542; EMD Millipore) followed by Cy3-tagged anti-rat IgG (1:500, Jackson  
53 ImmunoResearch Laboratories) and Cy3-tagged anti-sheep IgG (1:500, Jackson ImmunoResearch  
54 Laboratories), respectively. Quantification of Ly6G positive area was done by averaging total Ly6G positive  
55 pixels of ten random outer medulla fields (at 200X) per kidney section with ImageJ software. Renal mRNA  
56 was isolated by following the ethanol-precipitation method, and RNA concentration was determined based on

57 spectrophotometric determination of a 260/280 ratio. cDNA was generated from the resultant tissue RNA using  
58 the iScript cDNA Synthesis Kit (Bio-Rad) as described by the manufacturer. Resultant cDNA was then used  
59 to determine relative mRNA expression of *Havcr1* (Kim-1) and *Actb* (b-actin) using the iTAC Universal SYBR  
60 Green Supermix (Bio-Rad). Primers used were as follows:

61 *Havcr1* (forward): TGCTGCTACTGCTCCTTGTGAG,

62 (reverse): GGCAACCACGCTTAGAGATGC;

63 *Actb* (forward): AAGATCAAGATCATTGCTCCTCCTG,

64 (reverse): AAACGCAGCTCAGTAACAGTCC;

65 *Tnf* (forward): CCTCCCTCTCATCAGTTCTATGG,

66 (reverse): CGTGGGCTACAGGCTTGTC;

67 *Il6* (forward): TGGCTAAGGACCAAGACCATCCAA,

68 (reverse): AACGCACTAGGTTTGCCGAGTAGA;

69 *Il1b* (forward): AATGACCTGTTCTTTGAAGTTGAC,

70 (reverse): GTGATACTGCCTGCCTGAAG;

71 *Cxcl1* (forward): TGGCTGGGATTCACCTCAAGAACA,

72 (reverse): TGTGGCTATGACTTCGGTTTGGGT;

73 *Cxcl2* (forward): AAAGTTTGCCTTGACCCTGAAGCC,

74 (reverse): TTTCCAGGTCAGTTAGCCTTGCCT.

75

## 76 **Rat experiments (VNS, sympathetic nerve activity recording, IRI)**

77 For sympathetic nerve activity recording, Sprague-Dawley rats were anesthetized with a mixture of urethane  
78 (500 mg/kg) and  $\alpha$ -chloralose (50 mg/kg) given i.p. Depth of anesthesia was assessed by absence of the corneal  
79 and hindpaw withdrawal reflexes. Additional anesthetic was administered as necessary (10% of the original  
80 dose, i.p.). Body temperature was maintained at  $37.0 \pm 0.5$  °C with a servo-controlled temperature pad (TC-  
81 1000; CWE) and a blanket. All surgical procedures were performed under aseptic conditions. Mechanical

82 ventilation with 100% oxygen was maintained through a tracheal tube. To record the splenic/lumbar and renal  
83 sympathetic nerve activity during VNS, the postganglionic sympathetic nerve was isolated through a  
84 laparotomy and a right flank incision, respectively. Two stainless-steel electrodes (AS633; Cooner Wire) were  
85 placed around the postganglionic sympathetic nerve. The nerve and electrodes were covered and fixed with  
86 silicone gel (Kwik-Sil; World Precision Instruments). To perform central VNS, the left cervical vagus nerve  
87 was isolated via a midline cervical incision and transected, and then two stainless-steel electrodes (AS633;  
88 Cooner Wire) were placed at the central end of the transected vagus nerve. The electrical stimulation (square  
89 wave; 1, 3, and 5 Hz; 150  $\mu$ A intensity; 1-ms pulses) was applied using a Grass model S88 stimulator and  
90 stimulus isolation unit (Astro-Med Inc.). For sham VNS, rats underwent similar procedures but the electrodes  
91 and stimulator were disconnected. All analog data were acquired on a computer via a Micro3 1401 digitizer  
92 (CED) and processed using Spike 2 software (v7.06; CED). The sympathetic nerve activities were band-pass  
93 filtered (100–1000 Hz), rectified and integrated.

94 To confirm that VNS with the parameters used for nerve recordings is protective against kidney IRI in  
95 rats, another group of rats was anesthetized with an i.p. injection of ketamine (120 mg/kg) and xylazine (12  
96 mg/kg). The electrical stimulation (square wave, 5 Hz, 150  $\mu$ A intensity, 1-ms pulses) at left cervical vagus  
97 nerve was applied for 10 min as described above. Twenty-four hours after VNS, rats were anesthetized with  
98 an i.p. injection of ketamine (120 mg/kg) and xylazine (12 mg/kg). Bilateral kidney IRI was performed through  
99 flank incisions by clamping the renal pedicles for 45 min. The clamps were then removed and the wound  
100 sutured after restoration of blood flow was visually observed. Rats received buprenorphine-SR (1.0 mg/kg) as  
101 a postoperative analgesic. Twenty-four hours after IRI, rats were euthanized for measurement of plasma  
102 creatinine.

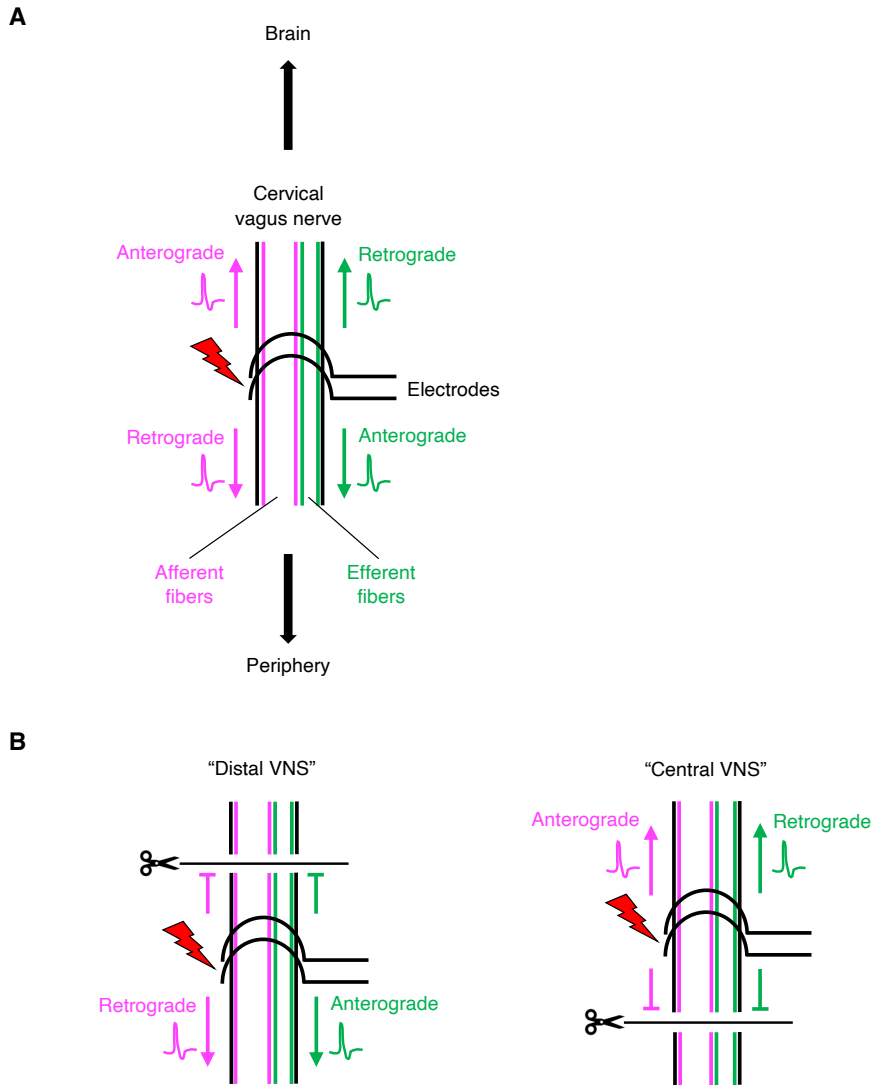

103  
104

105 **Supplementary Fig. 1. Four distinct pathways in the cervical vagus nerve activated by electrical**  
 106 **stimulation.** (A) Illustration depicting four distinct pathways in the cervical vagus nerve activated by electrical  
 107 vagus nerve stimulation (VNS). Vagus nerve contains motor (efferent) and sensory (afferent) fibers. Action  
 108 potentials elicited by VNS are transmitted in two directions (anterograde and retrograde) in each type of fibers.  
 109 (B) Illustration depicting two distinct pathways in the cervical vagus nerve activated by “distal VNS” and  
 110 “central VNS”. The terms distal and central VNS are used to describe the direction of impulse flow resulting  
 111 from electrical stimulation at the distal (towards the periphery) and central end (towards the brain) of the  
 112 transected vagus nerve, respectively. Local anesthesia can also be used to block nerve conduction. Note that  
 113 these experimental paradigms are still not selective for a single pathway but are a combination of two distinct  
 114 pathways in efferent and afferent fibers.

115 **Validation of mouse models for selective vagus efferent versus vagus afferent fiber stimulation**  
116 **(Supplementary Fig. 2-6)**

117 *Chat-ChR2* (for selective optogenetic efferent fiber stimulation) and *Vglut2-ChR2* (for selective optogenetic  
118 afferent fiber stimulation) mice were created and validated (Supplementary Fig. 2). Expression of ChR2-eYFP  
119 was confirmed by directly observing eYFP fluorescence in the cervical vagus nerve trunk (Supplementary Fig.  
120 3, A-C). We confirmed that ChR2 is selectively expressed in vagal efferents in *Chat-ChR2* mice, and in vagal  
121 afferents in *Vglut2-ChR2* mice (Supplementary Fig. 3, D-N). In *Chat-ChR2* mice (Supplementary Fig. 3, D-  
122 H), ChR2-eYFP was expressed in cholinergic neurons (ChAT+) in the dorsal motor nucleus of the vagus  
123 (DMV) and the nucleus ambiguus (nAmb) (Supplementary Fig. 3, D-F), but not in the nodose ganglion  
124 (Supplementary Fig. 3, G and H). ChR2-eYFP was expressed in cholinergic axons of DMV neurons  
125 (highlighted by arrows in Supplementary Fig. 3, E and F). In *Vglut2-ChR2* mice, ChR2-eYFP was absent from  
126 neurons in the DMV and nAmb (Supplementary Fig. 3, I-K), and present in neuronal cell bodies in the nodose  
127 ganglion (Supplementary Fig. 3, L and M). ChR2-eYFP axons were observed in the vagal afferents in the  
128 solitary tract (highlighted by arrows in Supplementary Fig. 3, J and K). No ChR2-eYFP was observed in Cre-  
129 negative control mice (Supplementary Fig. 3N). Blue laser application to the cervical vagus nerve evoked  
130 action potentials in the vagus nerve thereby confirming functional expression of ChR2 in *Chat-ChR2*  
131 (Supplementary Fig. 4A) and *Vglut2-ChR2* (Supplementary Fig. 4B) mice, whereas the laser light did not  
132 evoke action potentials in Cre-negative control mice (Supplementary Fig. 4C). We also confirmed the  
133 selectivity of stimulation (efferent vs. afferent fibers) in *Chat-ChR2* and *Vglut2-ChR2* mice by observing  
134 changes in heart rate and respiratory rate during optogenetic VNS. Selective stimulation of vagus efferent  
135 fibers decreases heart rate without changing respiratory rate, since these fibers innervate the sinoatrial and  
136 atrioventricular nodes (4). Optogenetic VNS in *Chat-ChR2* mice resulted in a significant decrease in heart rate  
137 as expected (Supplementary Fig. 5A). In contrast, selective stimulation of vagus afferent fibers decreases  
138 respiratory rate, which is known as the Hering-Breuer inflation reflex (5). Optogenetic VNS in *Vglut2-ChR2*  
139 mice resulted in a significant decrease in both heart rate and respiratory rate (Supplementary Fig. 5B); the

140 former change is probably through a vago-vagal reflex, in which stimulation of vagus afferent fibers leads to  
141 activation in the dorsal motor nucleus of vagus efferent neurons. The laser light had no effect on heart rate or  
142 breathing in Cre-negative control mice (Supplementary Fig. 5, C and D). Next we transected the cervical vagus  
143 nerve and applied blue laser light to the central or distal end of the transected vagus nerve (Supplementary Fig.  
144 5, E and F). In *Chat-ChR2* mice, stimulation of the distal end decreased heart rate but stimulation of the central  
145 end did not change heart rate or respiratory rate (Supplementary Fig. 5E). In *Vglut2-ChR2* mice, stimulation  
146 of the central end decreased both heart rate and respiratory rate whereas stimulation of the distal end had no  
147 effect (Supplementary Fig. 5F). Unchanged heart rate during stimulation at the distal end of the cut vagus in  
148 *Vglut2-ChR2* mice excluded the possibility that vagal efferent fibers were stimulated in *Vglut2-ChR2* mice.  
149 We also applied bupivacaine, a local anesthetic, directly to the cervical vagus nerve to block nerve conduction  
150 and then applied blue laser to the central or distal side of the anesthetized area, which yielded the same results  
151 as those in the experiments with transected vagus nerve (Supplementary Fig. 6, A and B). The efficacy of  
152 bupivacaine application in nerve conduction blockade was confirmed by the observation that light-evoked  
153 retrograde action potentials were blocked by bupivacaine applied between the stimulation site and recording  
154 site (Supplementary Fig. 6C). In addition, 90 min after blue laser application to the left cervical vagus nerve  
155 for 10 min (5 Hz), a significantly greater number of c-Fos positive NTS neurons was observed in *Vglut2-ChR2*  
156 mice than in *Chat-ChR2* and control mice (Supplementary Fig. 6D). These results suggest that efferent and  
157 afferent fibers are selectively stimulated by optogenetic VNS in *Chat-ChR2* and *Vglut2-ChR2* mice,  
158 respectively. Stimulation at different frequencies revealed the frequency response of changes in heart rate and  
159 respiratory rate in these mice (Supplementary Fig. 5, C and D). 5 Hz was used in the remainder of the  
160 optogenetic VNS experiments (mostly to investigate its protective effect against kidney injury) since  
161 stimulation at 5 Hz produced a small (< 10%) but reliable reduction in heart rate and respiratory rate.



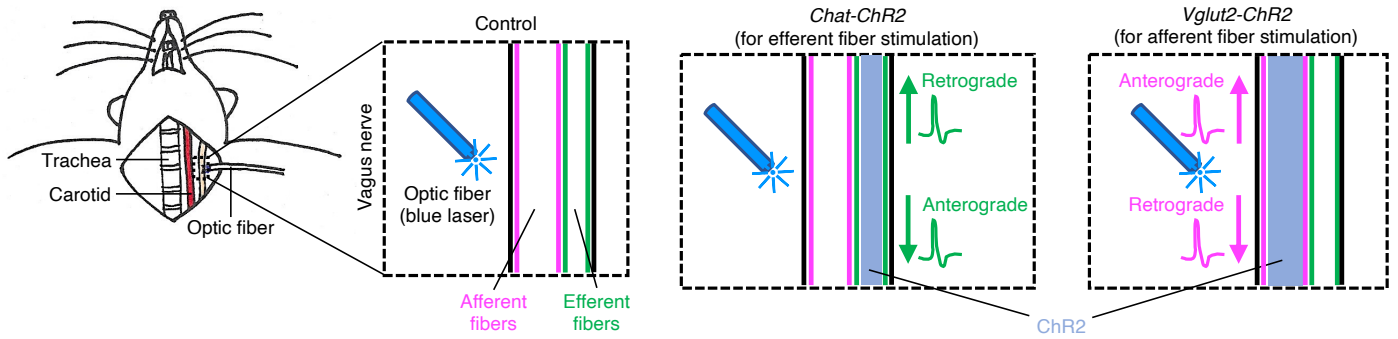

162

163

164

165

166

167

168

169

**Supplementary Fig. 2. Illustration depicting the strategy for optogenetic vagus nerve stimulation in *Chat-ChR2* (for selective efferent fiber stimulation) and *Vglut2-ChR2* (for selective afferent fiber stimulation) mice.** The left cervical vagus nerve was surgically exposed in anesthetized mice and blue laser was used for stimulation. ChR2 expression in the vagus nerve was limited to efferent and afferent fibers (blue shading) in *Chat-ChR2* and *Vglut2-ChR2* mice, respectively. Action potentials elicited by optogenetic stimulation are transmitted in two directions (anterograde and retrograde) in ChR2-expressing fibers.

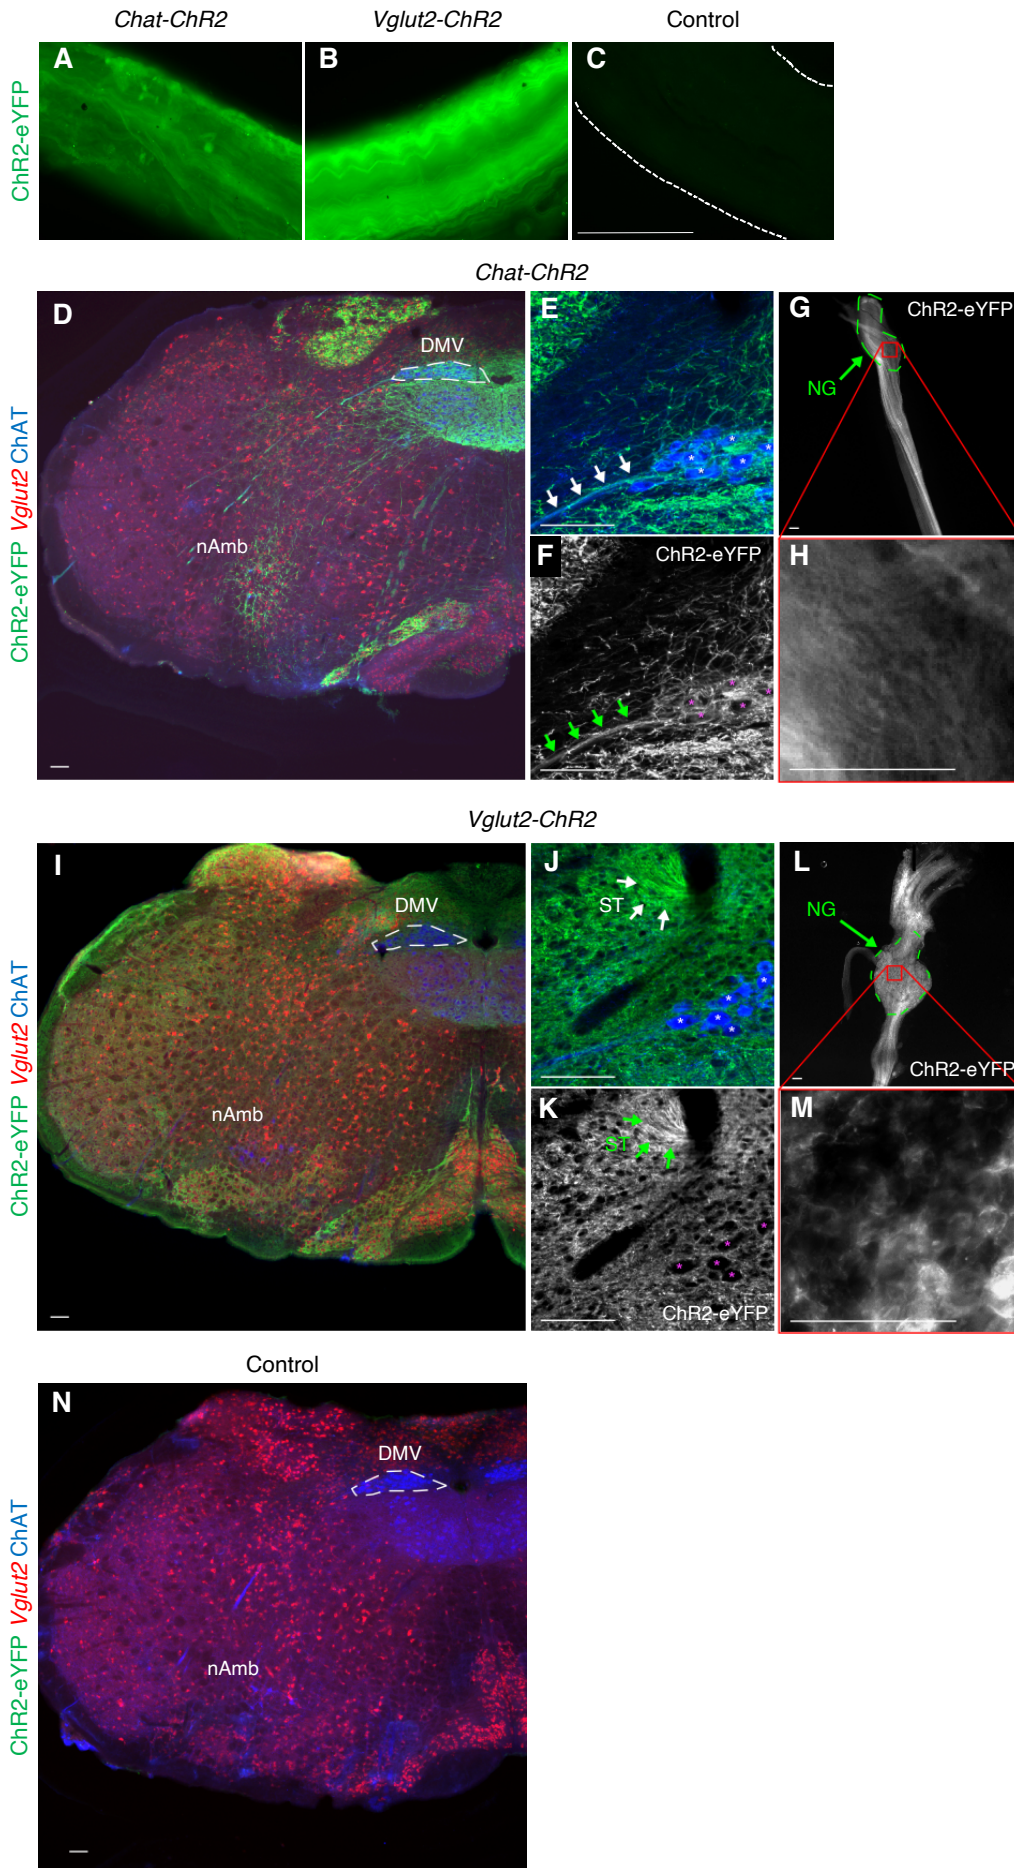

171 **Supplementary Fig. 3. ChR2 is selectively expressed in vagal efferents in *Chat-ChR2* mice, and in vagal**  
172 **afferents in *Vglut2-ChR2* mice. (A-C)** Fluorescence microscopy images of the left cervical vagus nerve trunk  
173 from *Chat-ChR2* (A), *Vglut2-ChR2* (B), and control (C) mice. eYFP is fused with ChR2 in these mice. Note  
174 that the signal intensities are consistent with the fact that the vagus is composed of about 80% sensory afferent  
175 fibers and about 20% motor efferent fibers (6), which is nominally reflected in the illustrations depicting  
176 afferent and efferent fibers in the relevant figures. (D-F) Representative images of ChR2-eYFP (green), *Vglut2*  
177 (red), and ChAT (blue) in the brainstem of *Chat-ChR2* mice. Note that ChR2-eYFP was expressed in the dorsal  
178 motor nucleus of the vagus (DMV), the nucleus ambiguus (nAmb) (D), and the axons (highlighted by arrows)  
179 originating from ChAT-positive cell bodies (asterisks) in DMV (E and F). (G and H) Cervical vagus nerve  
180 and nodose ganglion (NG) in *Chat-ChR2* mice. Fibers but no cell bodies were positive for ChR2-eYFP (white).  
181 These findings indicate selective expression of ChR2 in vagal efferents in *Chat-ChR2* mice. (I-K)  
182 Representative images of ChR2-eYFP (green), *Vglut2* (red), and ChAT (blue) in the brainstem of *Vglut2-ChR2*  
183 mice. Note that ChAT-expressing neurons (e.g., DMV, nAmb) did not express ChR2-eYFP (asterisks: ChAT-  
184 positive cell bodies in DMV), whereas ChR2-eYFP-positive fibers were observed in the solitary tract (ST,  
185 highlighted by arrows). (L and M) Cervical vagus nerve and NG in *Vglut2-ChR2* mice. Fibers and cell bodies  
186 were positive for ChR2-eYFP (white). These findings indicate selective expression of ChR2 in vagal afferents  
187 in *Vglut2-ChR2* mice. (N) Representative images of ChR2-eYFP (green), *Vglut2* (red), and ChAT (blue) in the  
188 brainstem of Cre-negative control mice. No expression of ChR2-eYFP was observed. Bregma level for  
189 brainstem sections: -7.47 mm, scale bar: 200  $\mu$ m in all figures. On the brainstem sections, ChR2-eYFP and  
190 ChAT protein were detected by immunostaining, and *Vglut2* mRNA was detected by in situ hybridization.  
191 Expression of ChR2-eYFP in the cervical vagus nerve and NG was detected by directly observing eYFP  
192 fluorescence.

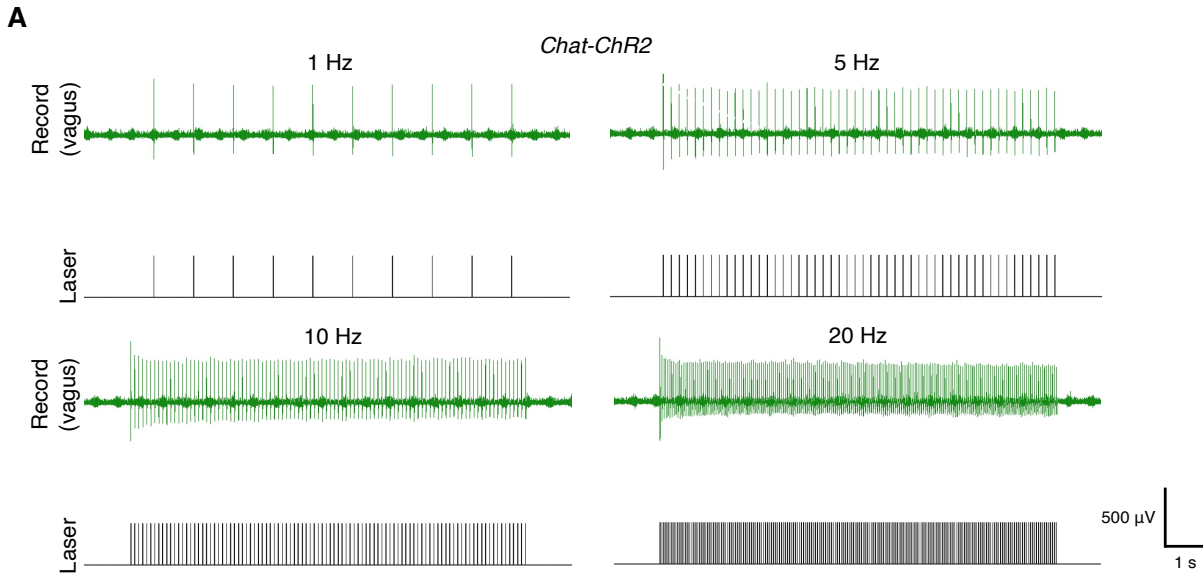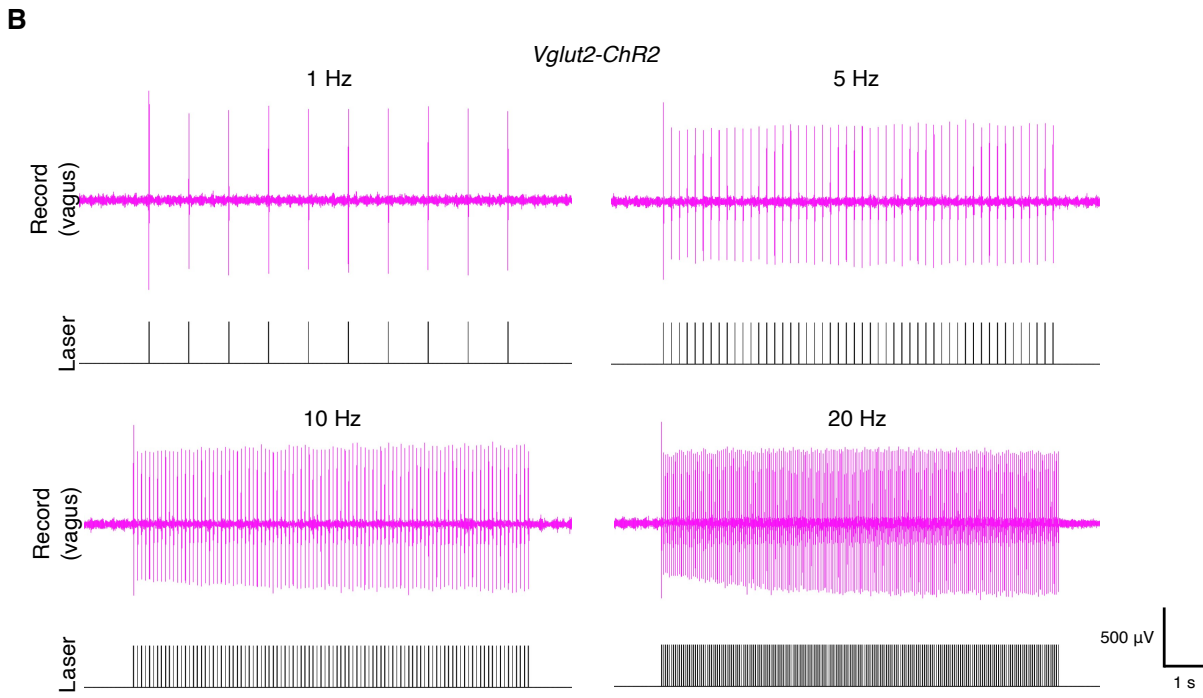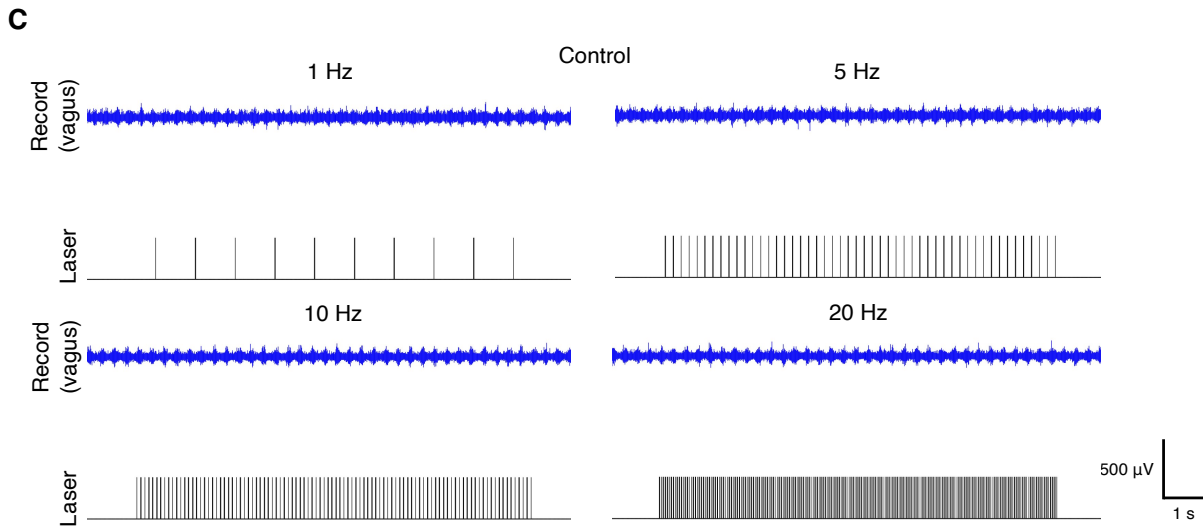

194 **Supplementary Fig. 4. Function of ChR2 in the cervical vagus nerve of *Chat-ChR2* and *Vglut2-ChR2***  
195 **mice.** Whole nerve electrophysiological recordings at left cervical vagus nerve in *Chat-ChR2* (A), *Vglut2-*  
196 *ChR2* (B), and control mice without ChR2 expression (C). The left cervical vagus nerve was surgically exposed  
197 in anesthetized mice and illuminated by blue laser (1, 5, 10, 20 Hz) to activate ChR2-expressing fibers. Note  
198 that each blue laser application successfully evoked an action potential in *Chat-ChR2* (A) and *Vglut2-ChR2*  
199 (B) mice whereas no action potential was evoked in control mice (C).

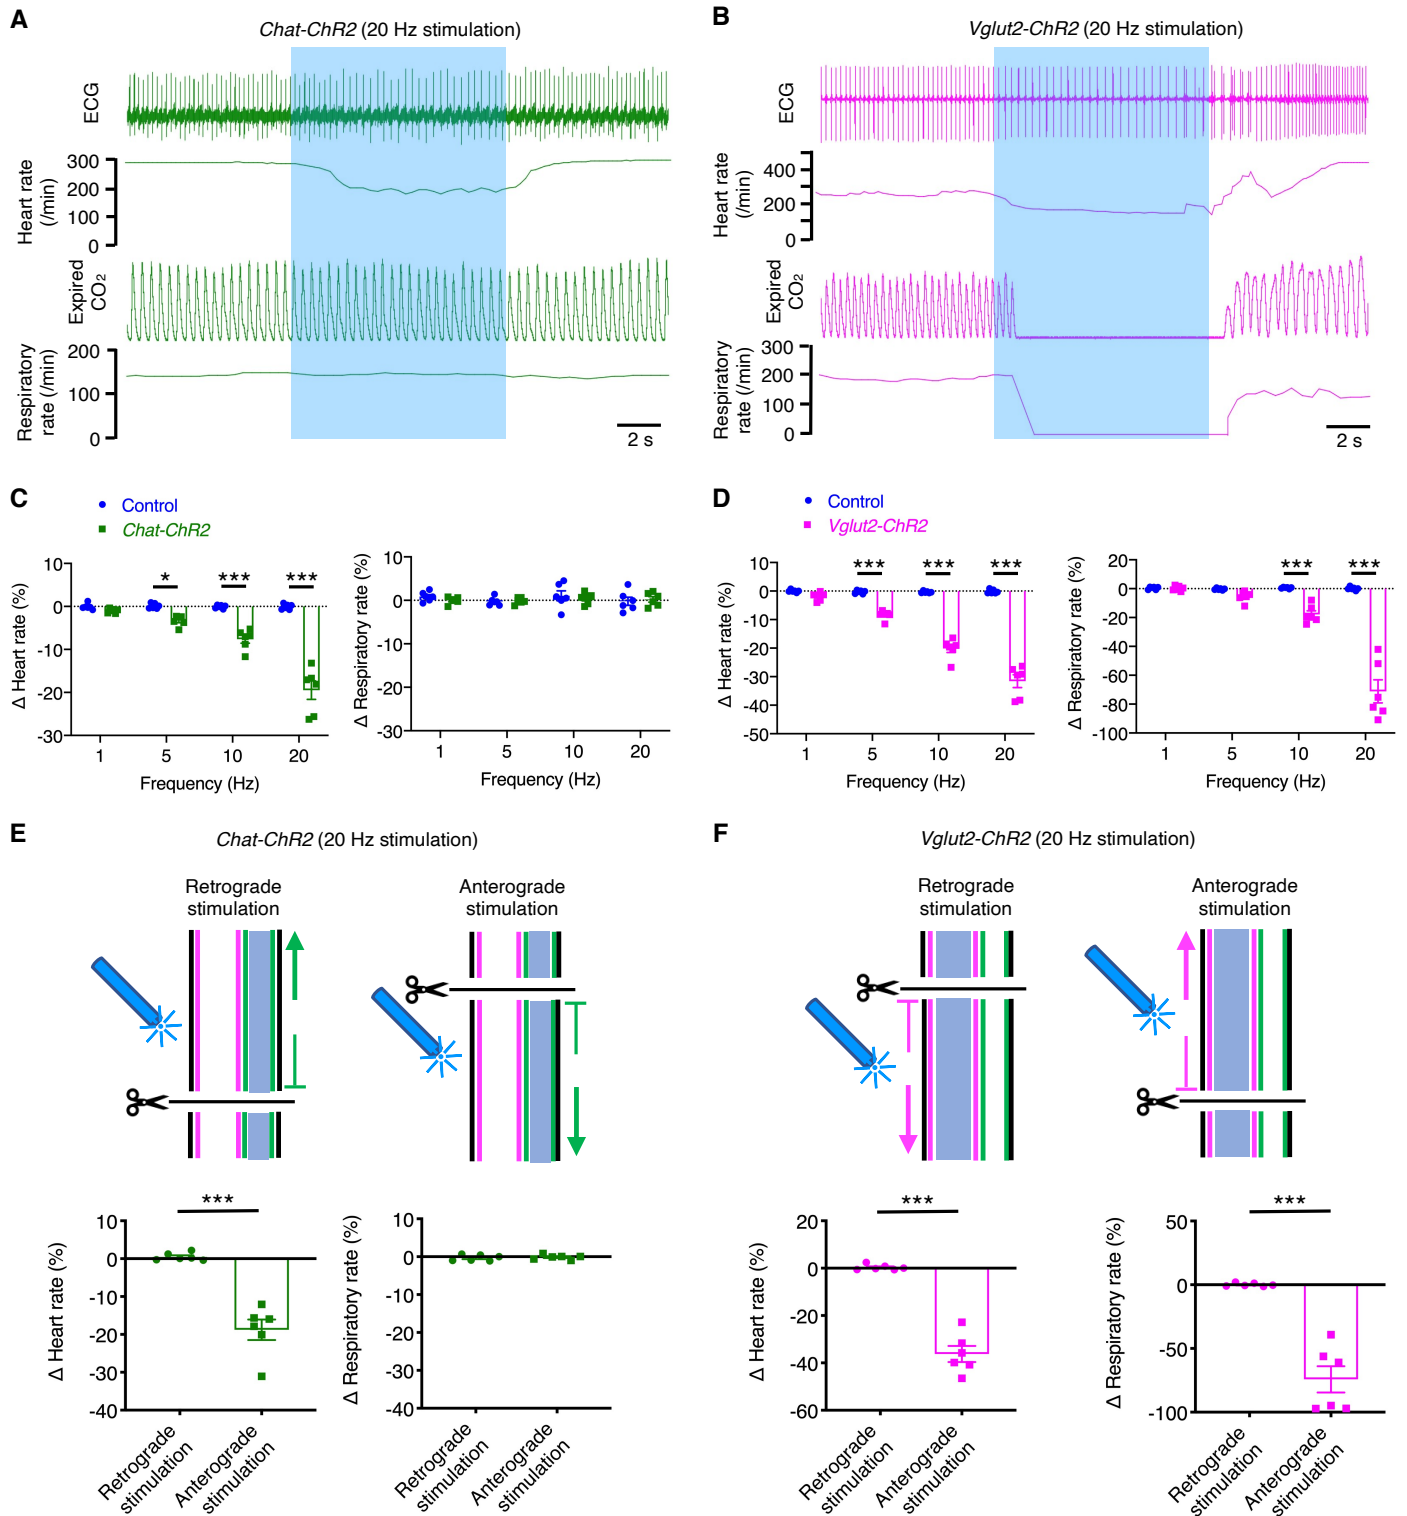

200

201

202 **Supplementary Fig. 5. Proof of selective stimulation in *Chat-ChR2* and *Vglut2-ChR2* mice. (A and B)**

203 Representative measurements of heart rhythm (ECG) and respiratory rhythm (expired CO<sub>2</sub>) following

204 optogenetic vagus nerve stimulation (blue shading; 20 Hz, 10 s) in *Chat-ChR2* (A) and *Vglut2-ChR2* (B) mice.

205 (C and D) Frequency response data summarizing the effects of optogenetic vagus nerve stimulation (10 s) on

206 heart rate and respiratory rate in *Chat-ChR2* (C), *Vglut2-ChR2* (D), and control (C and D) mice. (E and F)  
207 Changes in heart rate and respiratory rate following optogenetic retrograde versus anterograde vagus nerve  
208 stimulation (20 Hz, 10 s) in *Chat-ChR2* (E) and *Vglut2-ChR2* (F) mice. The left cervical vagus nerve was  
209 transected and blue laser was applied to the central or distal end for retrograde or anterograde stimulation. n =  
210 6 in each group (C-F). Data are represented as mean  $\pm$  s.e.m. \* $P < 0.05$  and \*\*\* $P < 0.001$  by two-way ANOVA  
211 with post hoc Sidak test (C and D) or unpaired two-sided Student's  $t$  test (E and F).

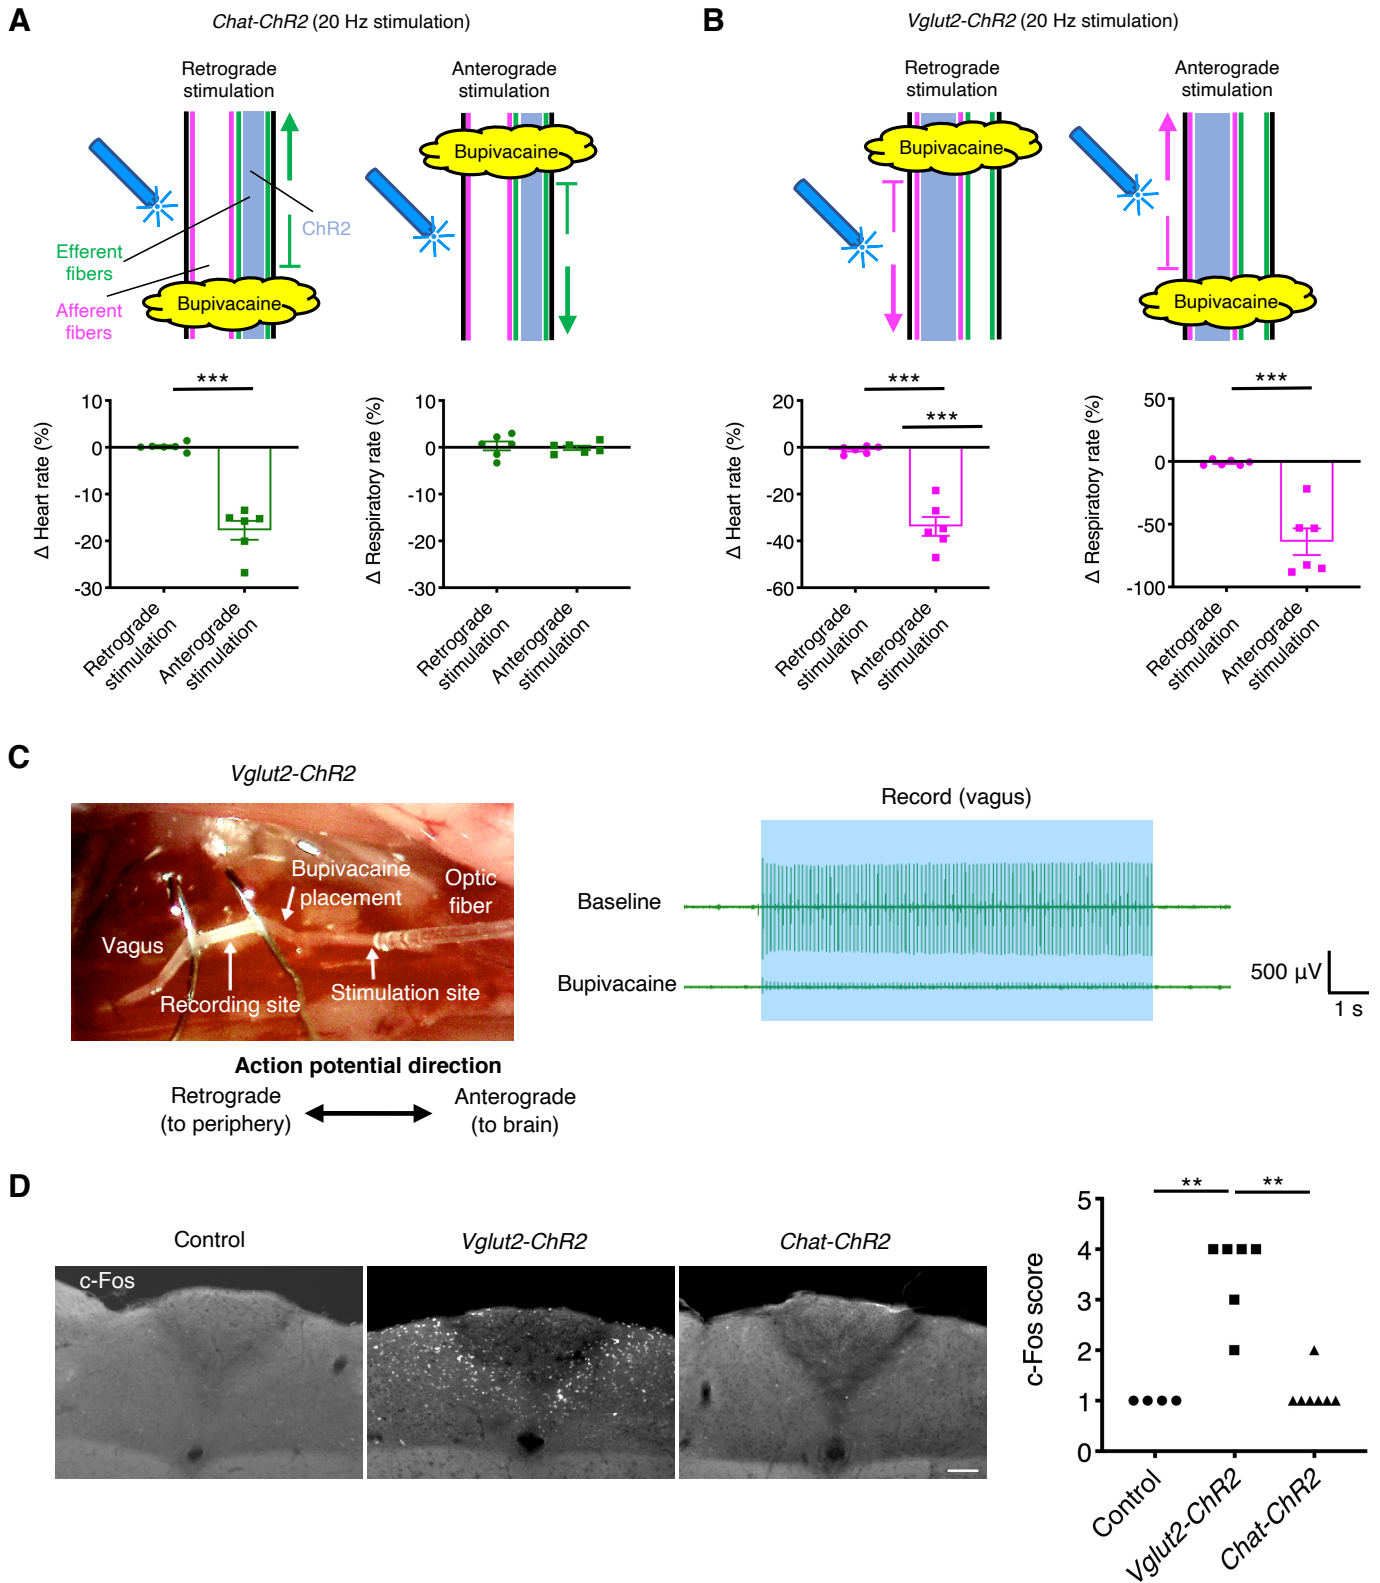

212  
213

214 **Supplementary Fig. 6. Proof of selective stimulation and effect of bupivacaine application to the vagus**  
 215 **nerve in blocking nerve conduction. (A and B) Changes in heart rate and respiratory rate following**  
 216 **optogenetic retrograde versus anterograde vagus nerve stimulation (20 Hz, 10 s) in *Chat-ChR2* (A) and *Vglut2-***



217 *ChR2* (B) mice. Bupivacaine was directly applied to the left cervical vagus nerve to block nerve conduction,  
218 and blue laser was applied to the central or distal side of the anesthetized area for selective retrograde or  
219 anterograde stimulation of efferent (*Chat-ChR2* mice) or afferent fibers (*Vglut2-ChR2* mice). Blue shading  
220 represents fibers that express ChR2 and that can be activated by blue laser. n = 6 in each group. Data are  
221 represented as mean  $\pm$  s.e.m. \*\*\* $P < 0.001$  by unpaired two-sided Student's *t* test. (C) Effect of bupivacaine  
222 application to the vagus nerve on evoked action potentials in *Vglut2-ChR2* mice with the experimental set-up.  
223 The cervical vagus nerve was surgically exposed in anesthetized mice and illuminated by blue laser (blue  
224 shading, 10 Hz) with or without bupivacaine application while action potentials were recorded at a distal site.  
225 Note that light stimulation at baseline produced large compound action potentials in the retrograde direction  
226 and these action potentials were blocked by bupivacaine applied between the stimulation site and recording  
227 site. This experiment was repeated in *Chat-ChR2* mice. (D) c-Fos immunoreactivity in the nucleus tractus  
228 solitarius (NTS; coronal plane, -7.48 mm from bregma) after selective stimulation. Cre-negative control (n =  
229 4), *Vglut2-ChR2* (for afferent fiber stimulation, n = 6), and *Chat-ChR2* (for efferent fiber stimulation, n = 7)  
230 mice were euthanized 90 min after blue laser application to the left cervical vagus nerve (5 Hz, 10 min).  
231 Sections were scored blind for c-Fos expression on a scale of 1-4 with 1 for little to no expression and 4 for  
232 greatest expression. \*\* $P < 0.01$  by Kruskal-Wallis with Dunn's test. Scale bar: 100  $\mu$ m.  
233

*Chat-ChR2* (Efferent fiber stimulation)

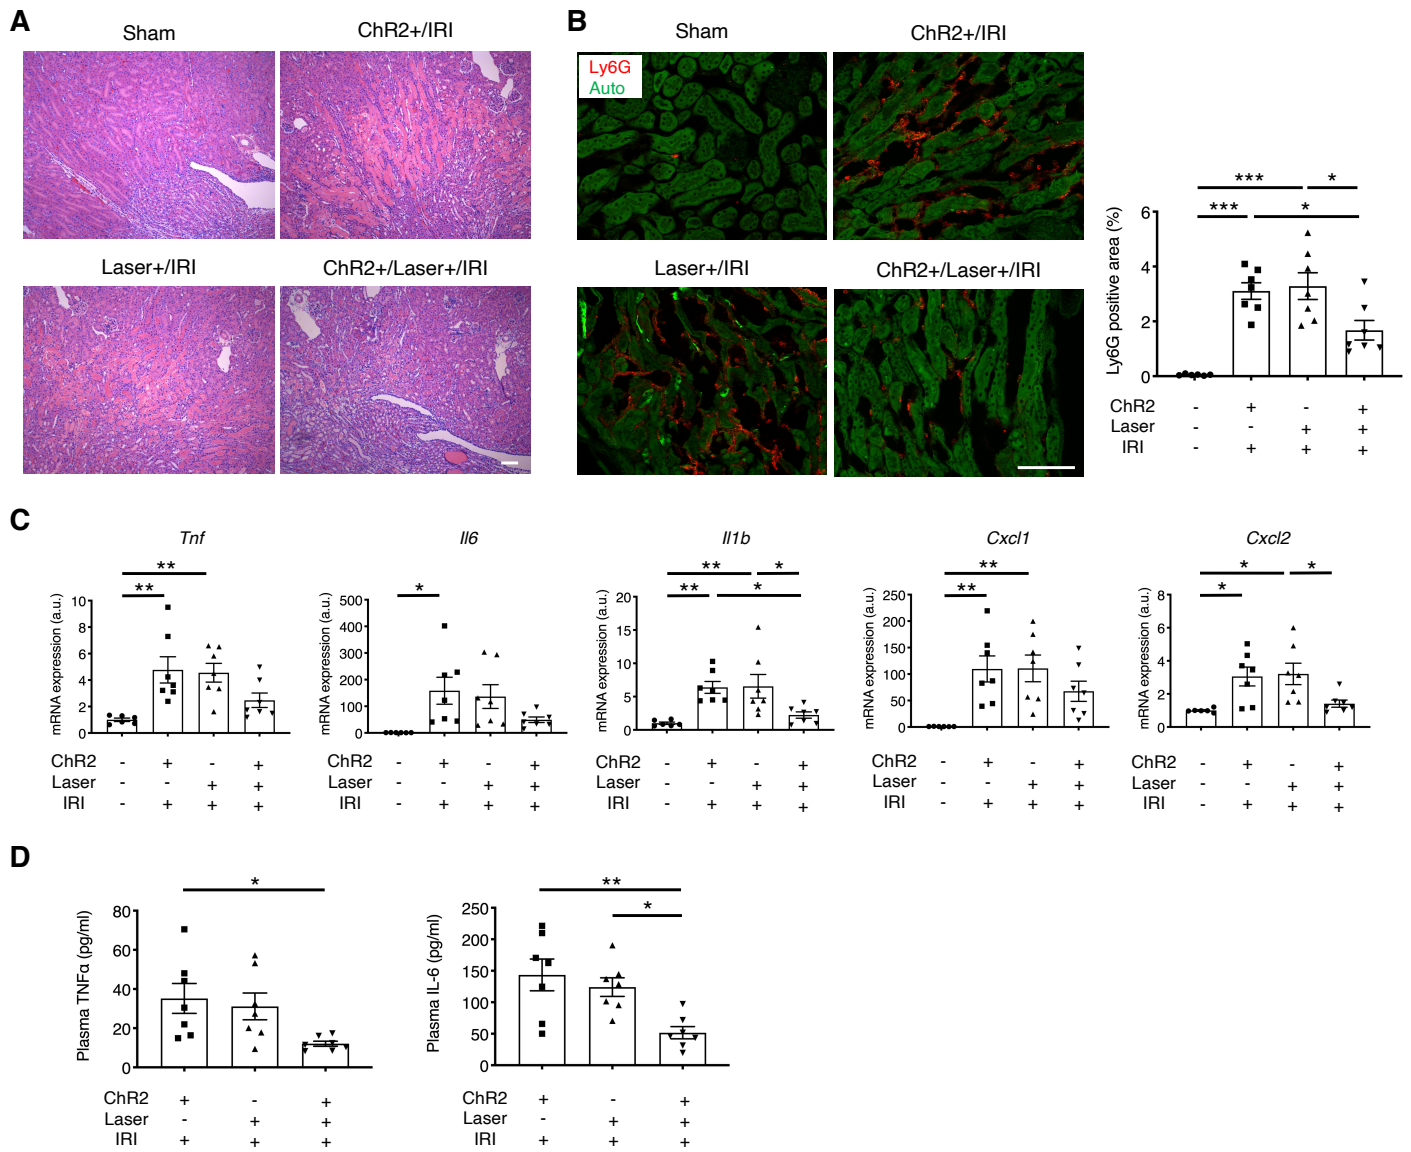

234

235

236

237

238

239

240

241

242

243

**Supplementary Fig. 7. Optogenetic stimulation of vagus efferent fibers protects kidneys against IRI**

**(related to Fig. 1).** (A-D) Effect of selective efferent fiber stimulation (5 Hz, 10 min) on kidney injury (A-C)

and plasma cytokine levels (D) at 24 h after sham or bilateral kidney IRI in *Chat-ChR2* and control mice. (A)

Photomicrographs taken at lower magnification of H&E staining of representative kidney sections (higher

magnification and quantitative analysis of acute tubular necrosis in Fig. 1D). (B) Neutrophil staining (Ly6G,

red) of kidney with quantification of Ly6G positive area as a percentage of the total surface area of kidney

section. Auto: autofluorescence (green). (C) Transcript levels of inflammatory cytokines/chemokines (*Tnf*, *Il6*,

*Il1b*, *Cxcl1*, *Cxcl2*) in the kidneys. (D) Plasma TNF $\alpha$  and IL-6 at 24 h after bilateral kidney IRI were determined

by ELISA. Plasma TNF $\alpha$  and IL-6 were under detection threshold in sham IRI group. n = 6 in sham IRI group

244 and  $n = 7$  in IRI groups (**B-D**). Scale bars, 100  $\mu\text{m}$ . Data are represented as mean  $\pm$  s.e.m.  $*P < 0.05$ ,  $**P <$   
245  $0.01$ , and  $***P < 0.001$  by one-way ANOVA with post hoc Tukey test (**B-D**).  
246

*Vglut2-ChR2* (Afferent fiber stimulation)

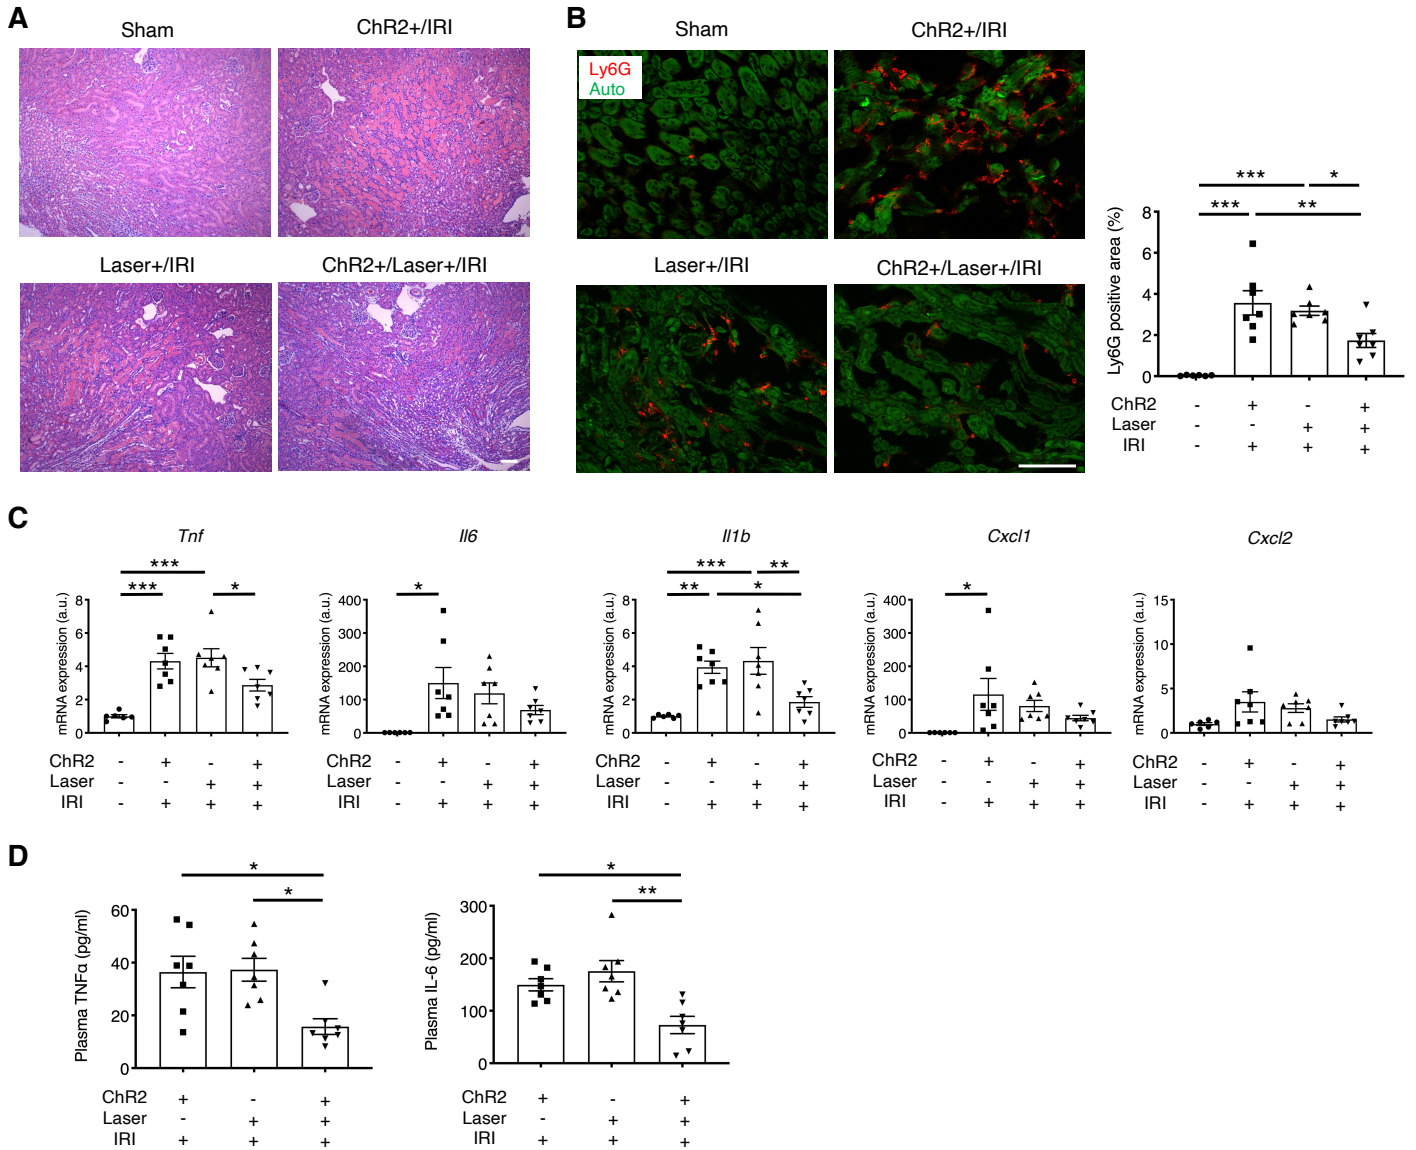

247

248 **Supplementary Fig. 8. Optogenetic stimulation of vagus afferent fibers protects kidneys against IRI**

249 **(related to Fig. 2).** (A-D) Effect of selective afferent fiber stimulation (5 Hz, 10 min) on kidney injury (A-C)

250 and plasma cytokine levels (D) at 24 h after sham or bilateral kidney IRI in *Vglut2-ChR2* and control mice.

251 (A) Photomicrographs taken at lower magnification of H&E staining of representative kidney sections (higher

252 magnification and quantitative analysis of acute tubular necrosis in Fig. 2D). (B) Neutrophil staining (Ly6G,

253 red) of kidney with quantification of Ly6G positive area as a percentage of the total surface area of kidney

254 section. Auto: autofluorescence (green). (C) Transcript levels of inflammatory cytokines/chemokines (*Tnf*, *Il6*,

255 *Il1b*, *Cxcl1*, *Cxcl2*) in the kidneys. (D) Plasma TNF $\alpha$  and IL-6 at 24 h after bilateral kidney IRI were determined

256 by ELISA. Plasma TNF $\alpha$  and IL-6 were under detection threshold in sham IRI group. n = 6 in sham IRI group  
257 and n = 7 in IRI groups (**B-D**). Scale bars, 100  $\mu$ m. Data are represented as mean  $\pm$  s.e.m. \* $P$  < 0.05, \*\* $P$  <  
258 0.01, and \*\*\* $P$  < 0.001 by one-way ANOVA with post hoc Tukey test (**B-D**).

259

**A**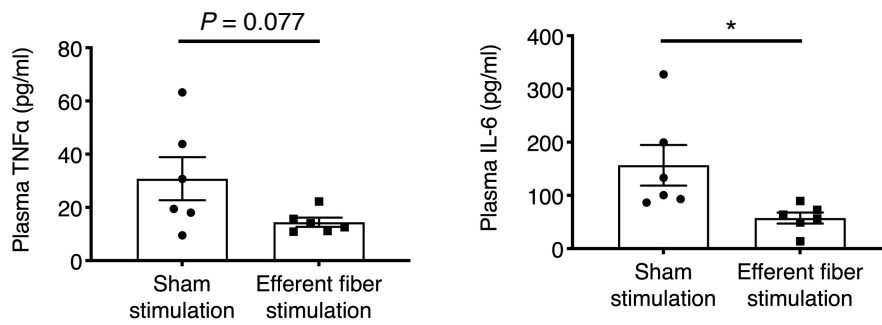**B**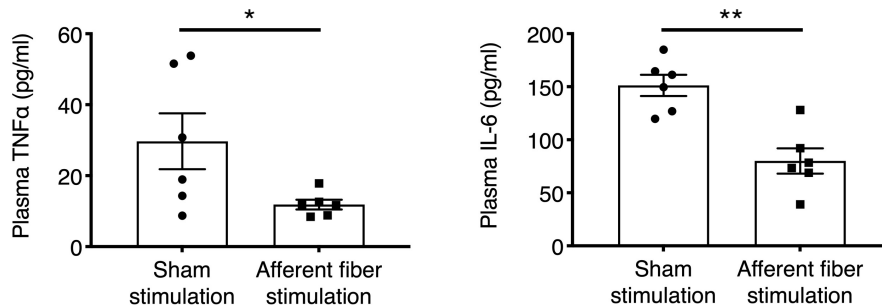

260

261 **Supplementary Fig. 9. Splenocyte adoptive transfer attenuates circulating inflammatory cytokine levels**262 **after IRI. (A and B) Donor mice underwent optogenetic vagus efferent fiber stimulation (*Chat-ChR2* mice,**263 **A), afferent fiber stimulation (*Vglut2-ChR2* mice, B) or sham stimulation (same trains of laser light delivered**264 **to Cre-negative littermates, A and B), and 24 h later splenocytes were isolated from the donor mice and were**265 **injected i.v. ( $1 \times 10^6$  cells/recipient mouse) into naïve recipient wild-type mice. The recipient mice were**266 **subjected to kidney IRI 24 h after splenocyte transfer. Plasma TNFα and IL-6 at 24 h after bilateral kidney IRI**267 **were determined by ELISA.  $n = 6$  in each group. Data are represented as mean  $\pm$  s.e.m.  $*P < 0.05$  and  $**P <$** 268 **0.01 by unpaired two-sided Student's *t* test (A and B).**

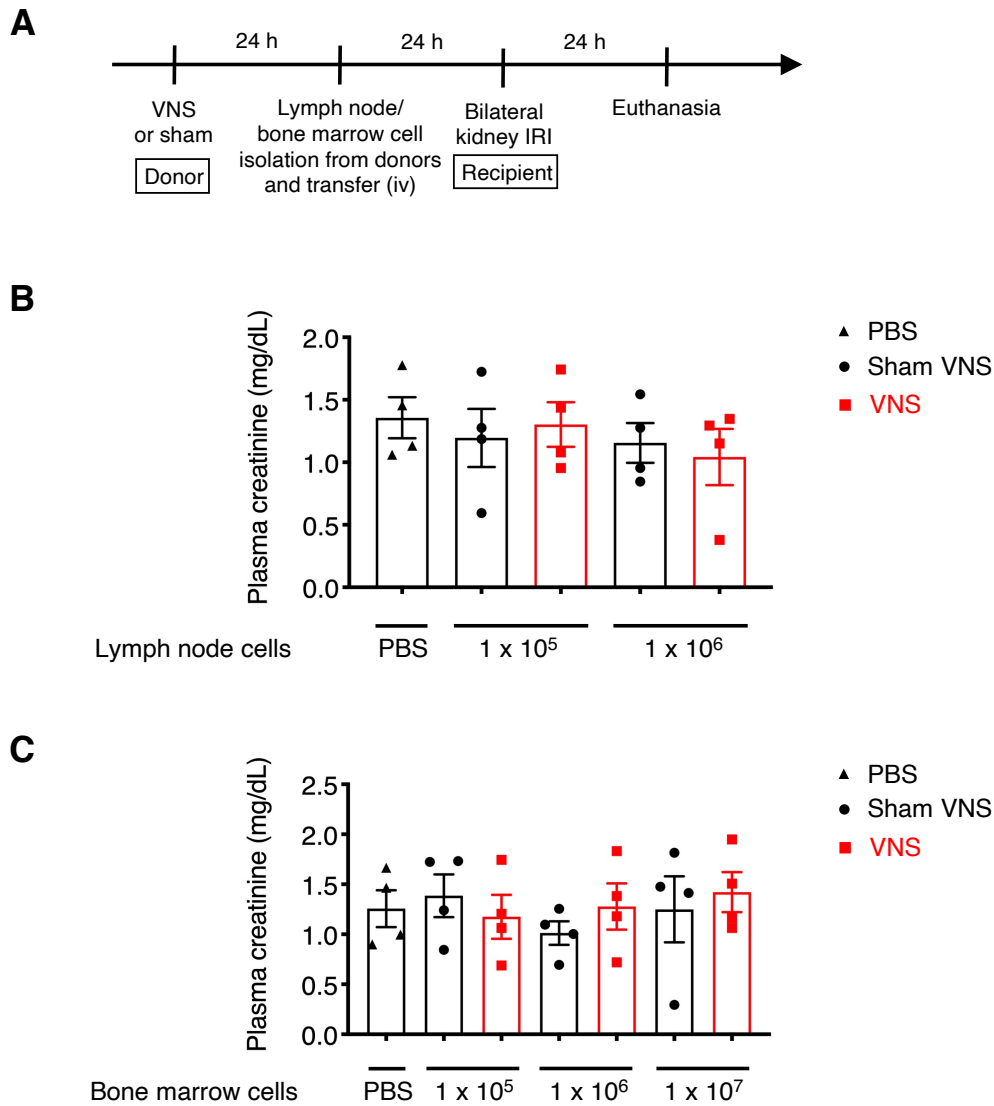

269

270 **Supplementary Fig. 10. Lymph node cells or bone marrow cells do not play an important role in the**  
 271 **protective effect of vagus nerve stimulation against kidney IRI. (A) Timeline of experiments for B and C.**  
 272 **(B) Plasma creatinine 24 h after bilateral kidney IRI. Donor mice underwent sham VNS or electrical VNS, and**  
 273 **24 h later inguinal lymph node cells were isolated from the donor mice and were injected i.v. ( $1 \times 10^5$  or  $1 \times$**   
 274  **$10^6$  cells/recipient mouse) into naïve recipient wild-type mice. PBS was injected i.v. in the control group. The**  
 275 **recipient mice were subjected to kidney IRI 24 h after the injection. (C) Plasma creatinine 24 h after bilateral**  
 276 **kidney IRI. Donor mice underwent sham VNS or electrical VNS, and 24 h later bone marrow cells were**  
 277 **isolated from the donor mice and were injected i.v. ( $1 \times 10^5$ ,  $1 \times 10^6$  or  $1 \times 10^7$  cells/recipient mouse) into naïve**  
 278 **recipient wild-type mice. PBS was injected i.v. in the control group. The recipient mice were subjected to**  
 279 **kidney IRI 24 h after the injection.  $n = 4$  in each group (B and C). Data are represented as mean  $\pm$  s.e.m.**

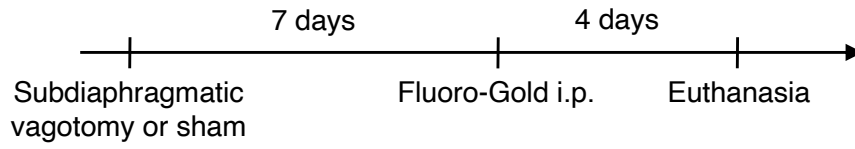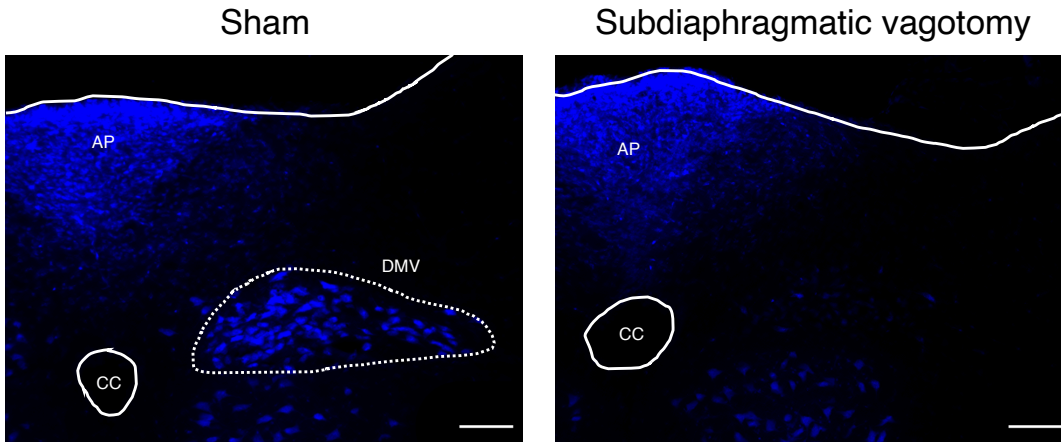

280

281

282

283

284

285

286

287

288

289

290

291

**Supplementary Fig. 11. Histological evidence of successful subdiaphragmatic vagotomy.** Representative histological picture of the mediadorsal aspect of brainstem sections showing the presence of Fluoro-Gold immunofluorescence (blue) in neurons of the dorsal motor nucleus of the vagus (DMV). Fluoro-Gold is a retrograde tracer – after i.p. injection, it is taken up by nerve terminals in the periphery and transported retrogradely to the brain where cell bodies of origin become labeled. Mice received i.p. injections of Fluoro-Gold seven days after subdiaphragmatic vagotomy or sham surgery. After four days, the mice were euthanized. Note that Fluoro-Gold immunofluorescence in DMV is observed in the sham mouse (because intact vagus nerve terminals can take up Fluoro-Gold) but not in the vagotomized mouse, whereas Fluoro-Gold is present to the same extent in both mice in the area postrema (AP), which lacks the blood–brain barrier. Green autofluorescence was used to reveal the outline of brain sections. CC, central canal. Scale bars: 100  $\mu$ m.



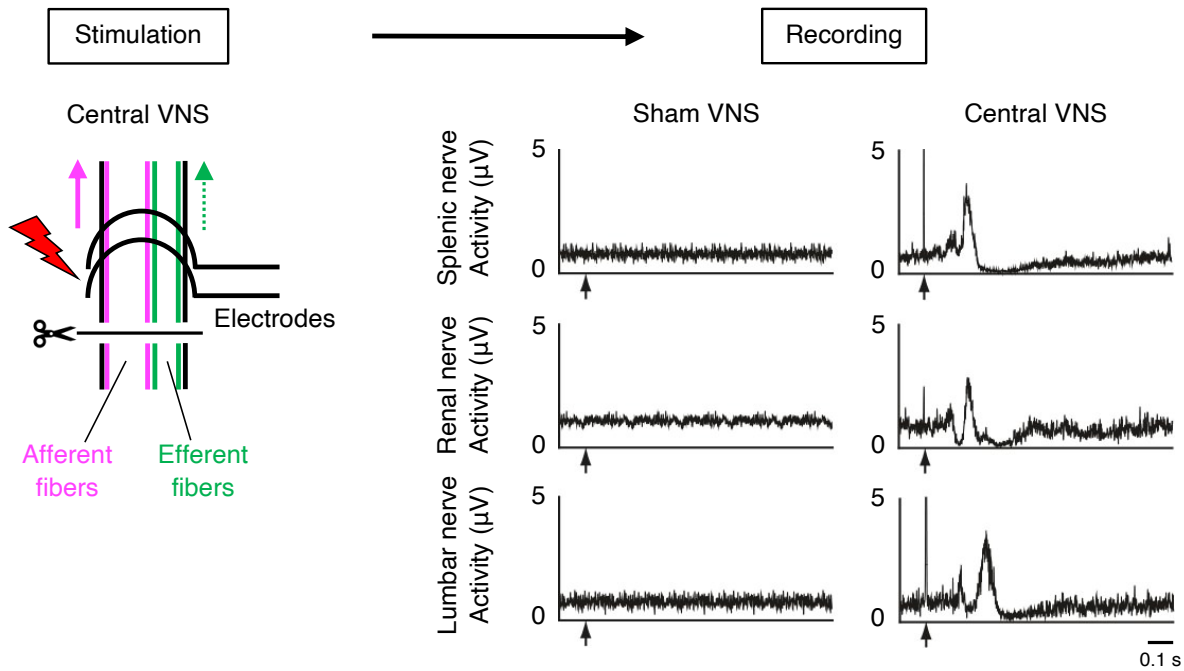

292

293 **Supplementary Fig. 12. Electrical central VNS activates sympathetic nervous system.** Representative  
 294 recordings of the central VNS-triggered sweeps of amplified evoked potentials at splenic nerve, renal nerve,  
 295 and lumbar nerve in Sprague-Dawley rats with transection of the left cervical vagus nerve. Central VNS or  
 296 sham VNS (disconnection between electrodes and the stimulator) were performed for 3 min at 1 Hz (square  
 297 wave, 150  $\mu$ A intensity, 1-ms pulses). The averaged evoked potentials were obtained from 180 sweeps in total.  
 298 Solid and dotted arrows in the illustration indicate action potential transmissions in afferent fibers in an  
 299 anterograde direction and in efferent fibers in a retrograde direction, respectively. Black arrows indicate  
 300 stimulation.

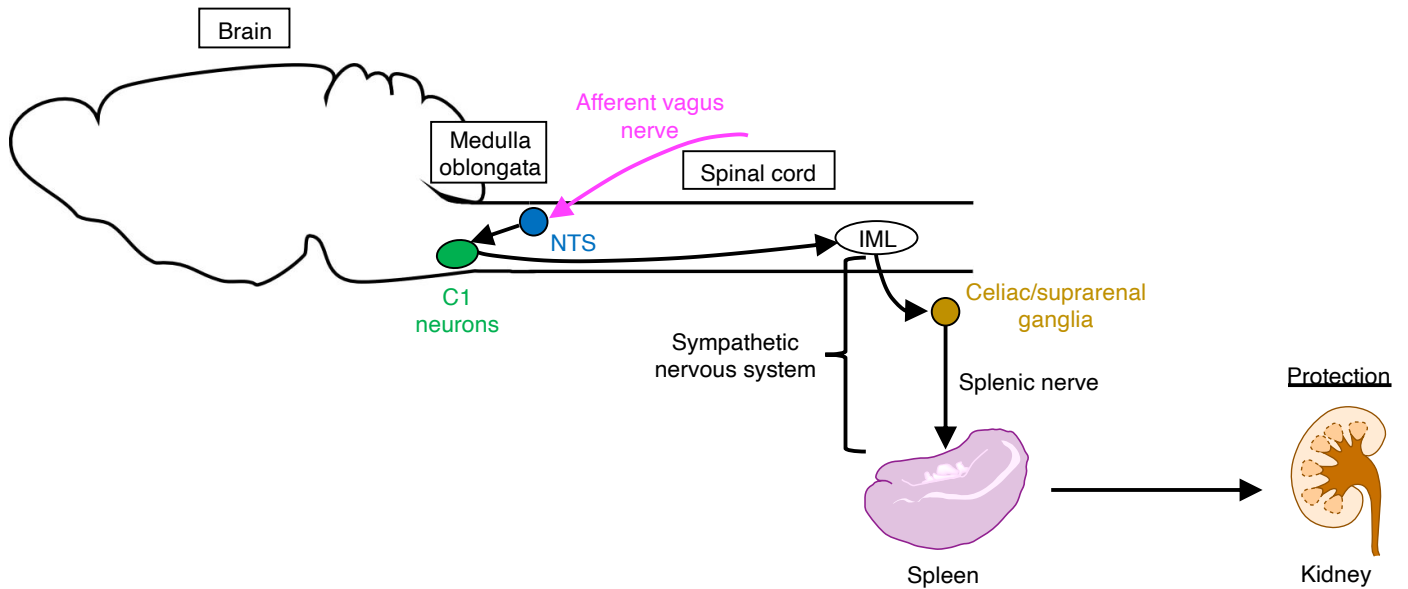

301  
302

303 **Supplementary Fig. 13. A newly discovered neural circuit involved in the kidney protection by vagus**  
 304 **afferent fiber stimulation.** Parasagittal view of the brain is shown. Stimulation of afferent vagus nerve  
 305 activates C1 neurons residing in the medulla oblongata through the nucleus tractus solitarius (NTS), which is  
 306 an integrative center for sensory information from the vagus nerve. The sympathetic nervous system plays a  
 307 predominant role as an efferent pathway from C1 neurons, and the signal is transmitted to the spleen through  
 308 the splenic nerve, which is predominantly a sympathetic nerve. The signal from the splenic nerve probably  
 309 alters the phenotype of splenocytes as in the canonical CAP activation, which contributes to the kidney  
 310 protection against IRI. It remains unclear how these splenocytes with an altered phenotype protect the kidney.  
 311 IML, the intermediolateral cell column.

312

313 SI References

- 314 1. C. Abe *et al.*, C1 neurons mediate a stress-induced anti-inflammatory reflex in mice. *Nat Neurosci*  
315 **20**, 700-707 (2017).
- 316 2. T. Inoue *et al.*, Vagus nerve stimulation mediates protection from kidney ischemia-reperfusion injury  
317 through alpha7nAChR+ splenocytes. *J Clin Invest* **126**, 1939-1952 (2016).
- 318 3. H. M. Perry *et al.*, Dynamin-Related Protein 1 Deficiency Promotes Recovery from AKI. *J Am Soc*  
319 *Nephrol* **29**, 194-206 (2018).
- 320 4. J. L. Ardell, W. C. Randall, Selective vagal innervation of sinoatrial and atrioventricular nodes in  
321 canine heart. *Am J Physiol* **251**, H764-773 (1986).
- 322 5. E. S. Schelegle, J. F. Green, An overview of the anatomy and physiology of slowly adapting  
323 pulmonary stretch receptors. *Respir Physiol* **125**, 17-31 (2001).
- 324 6. J. O. Foley, F. S. DuBois, Quantitative studies of the vagus nerve in the cat. I. The ratio of sensory to  
325 motor fibers. *J Comp Neurol* **67**, 49-67 (1937).

326
